# Supplementary material
Source: PubMed Central journal article supplement (PMC9577479)
Supplement: NIHMS1817905-supplement-1817905_Sup_Table.pdf [file NIHMS1817905-supplement-1817905_Sup_Table.pdf]

Supplementary Table : Statistical Analysis

| Figure | Test groups                                                                                                                                   | Test performed                                                          | P values                                                                               | Additional Statistical Reporting |
|--------|-----------------------------------------------------------------------------------------------------------------------------------------------|-------------------------------------------------------------------------|----------------------------------------------------------------------------------------|----------------------------------|
| 1a     | Lick rate across reward, neutral and aversive contexts (n=12 mice, 24 sessions)                                                               | Two-way ANOVA with Sidak's post hoc                                     | p<0.0001 for reinforced and probe trials; adjusted **p=0.08, ***p=0.0008, ****p<0.0001 | F (2, 138) = 116.9               |
| 1g     | CA1 feature-selective and conjunctive representation during retrieval (n=3 mice, 9 sessions)                                                  | Two tailed Wilcoxon matched-pairs signed rank test                      | p=0.0039                                                                               | W = 45                           |
| 2d     | Comparison between CA1 context neuron suppression by AC vs LEC inhibition (n= 4 mice, 7 sessions AC; n= 3 mice, 6 sessions LEC)               | Two -tailed Student's t-Test                                            | p = 0.001                                                                              | t=4.423, df=11                   |
| 2d     | Comparison between CA1 context inhibition vs chance inhibition by AC inhibition (n= 4 mice, 7 sessions)                                       | Two tailed Wilcoxon match paired signed rank Test; chance AC 33.4±0.02% | p=0.015                                                                                | W= -28                           |
| 2d     | Comparison between CA1 context neurons inhibition vs chance inhibition by LEC inhibition (n=3 mice, 6 sessions)                               | Two tailed Wilcoxon match paired signed rank Test; chance = 32.9±0.04%  | p>0.99                                                                                 | W=1                              |
| 2g     | Comparison between % inhibition of CA1 Context vs Non- context neurons by LEC inhibition (n=3 mice, 6 sessions) for AVOT, AOT and OT features | Two-way ANOVA with Sidak's post hoc                                     | p=0.37                                                                                 | F (1, 30) = 2.801                |
| 2g     | Comparison between % inhibition of CA1 Context vs Non- context neurons by AC inhibition (n=4 mice, 7 sessions) for AVOT, AOT and OT. Features | Two-way ANOVA with Sidak's post hoc                                     | Inhibition p<0.0001; adjusted p for AVOT (p=0.006), AOT (p=0.001), OT (p=0.002)        | F (1, 36) = 38.92                |
| 2h     | Discrimination index of Light Off and Light On trials in LEC-stGtACR2 cohort                                                                  | Two-way ANOVA with Sidak's post hoc                                     | Inhibition p = 0.82                                                                    | F (1, 16) = 0.8219               |
| 2h     | Discrimination index of Light Off and Light On trials in LEC-mCherry cohort                                                                   | Two-way ANOVA with Sidak's post hoc                                     | Inhibition p = 0.37                                                                    | F (1, 13) = 0.1601               |
| 2i     | Discrimination index of Light Off and Light On trials in AC-stGtACR2 cohort                                                                   | Two-way ANOVA with Sidak's post hoc                                     | Inhibition p<0.0001; adjusted *p=0.04; **p=0.006; ****p<0.0001                         | F (1, 17) = 43.79                |

|    |                                                                                                                                                 |                                                    |                                                                                                                                        |             |                                                         |
|----|-------------------------------------------------------------------------------------------------------------------------------------------------|----------------------------------------------------|----------------------------------------------------------------------------------------------------------------------------------------|-------------|---------------------------------------------------------|
| 2i | Discrimination index of Light Off and Light On trials in AC-mCherry cohort                                                                      | Two-way ANOVA with Sidak's post hoc                | p = 0.92                                                                                                                               |             | F (1, 20) = 0.008323                                    |
| 3c | Comparison between AC feature-selective and conjunctive representation during retrieval (n=3 mice, 9 sessions)                                  | Two tailed Wilcoxon matched-pairs signed rank test | p=0.002                                                                                                                                |             | W=-64.00                                                |
| 3d | Comparison between feature vs conjunctive representations between AC and CA1                                                                    | Two-way ANOVA with Sidak's post hoc                | Feature ***p=0.005, ****p<0.0001                                                                                                       | Conjunctive | Feature t=4.7, DF=16.<br>Conjunctive: t= 12.0 DF=16.00; |
| 3h | Net generalised feature ensemble response to same vs opposite context in AC                                                                     | Multiple paired t-test; two sided                  | *q=0.027                                                                                                                               |             | df=10; t ratio = 2.571                                  |
|    | Net generalised feature ensemble response to same vs opposite context in CA1                                                                    | Multiple paired t-test; two sided                  | ****q<0.0001                                                                                                                           |             | df = 8; t ratio = 17.30                                 |
| 3k | Discrimination index in TRAP'ed feature coding neurons cohort across R1 vs R6                                                                   | Two-way ANOVA with Sidak's post hoc                | Inhibition p<0.0001                                                                                                                    |             | F (1, 50) = 30.04                                       |
|    | Discrimination index in TRAP'ed feature coding neurons cohort across R6 vs R7                                                                   | Two-way ANOVA with Sidak's post hoc                | Inhibition p<0.0001; adjusted *p=0.035, **p=0.0033, ***p<0.0001                                                                        |             | F (1, 50) = 52.61                                       |
| 3k | Discrimination index in TRAP'ed habituation neurons cohort across R6 vs R7                                                                      | Two-way ANOVA with Sidak's post hoc                | Inhibition p = 0.71                                                                                                                    |             | F (1, 20) = 0.1402                                      |
| 4c | Comparison of distribution of time onset of AC and CA1 context ensembles during training (m1)                                                   | Two tailed Kolmogorov–Smirnov test                 | p<0.0001                                                                                                                               |             |                                                         |
|    | Comparison of distribution of time onset of AC feature and CA1 context ensembles during retrieval (m1)                                          | Two tailed Kolmogorov–Smirnov test                 | p=0.001                                                                                                                                |             |                                                         |
| 4d | AC Feature - CA1 Context ensemble net dF/F correlations between neutral and aversive feature trials (n=3 mice, 5 sessions with 3 features each) | Kruskal-Wallis One-Way ANOVA with Dunn's post hoc  | CA1 Neutral - AC Neutral vs CA1 Neutral - AC aversive : p=0.03<br><br>CA1 Aversive - AC Aversive vs CA1 Neutral - AC neutral : p=0.001 |             |                                                         |

CA1 Neutral - AC Neutral vs CA1 Aversive -  
AC aversive : p=0.04

CA1 Neutral - AC Aversive vs CA1 Aversive  
- AC aversive : p=0.04

CA1 Neutral - AC Neutral vs CA1 Neutral -  
AC aversive : p<0.0001

4e Long-range neurons correlated with AC (n=3 mice,  
5 sessions) Two sided paired Student's t-test p=0.009 t=4.665, df=4

4e Long-range neurons correlated with CA1 (n=3  
mice, 5 sessions) Paired Student's t-test, two-tailed p=0.055 t=2.678, df=4

#### EXTENDED DATA FIGURES

| Figure               | Test groups                                                                                                                                  | Test performed                      | P values                                                                              | Additional Statistical Reporting |
|----------------------|----------------------------------------------------------------------------------------------------------------------------------------------|-------------------------------------|---------------------------------------------------------------------------------------|----------------------------------|
| Extended Data Fig 1a | Latency to first lick across reward, neutral and aversive contexts (n=12 mice, 24 sessions)                                                  | Two-way ANOVA with Sidak's post hoc | p<0.0001 for reinforced and probe trials; adjusted *p=0.029; ***p=0.001; ****p<0.0001 | F (1.779, 71.16) = 51.84         |
| Extended Data Fig 1b | Lick rate across contexts for full cue trials in retrieval session (n=21 mice, 18 sessions)                                                  | Two-way ANOVA with Sidak's post hoc | p<0.0001; adjusted ***p<0.005                                                         | F (1.538, 26.14) = 16.94         |
| Extended Data Fig 1c | Discrimination index (normalised lick rate difference b/w reward and aversive context) in mCherry vs stGtACR2 in CA1 cohorts (n=6 mice each) | Two-way ANOVA with Sidak's post hoc | p=0.015 for probe trials; p=0.52 for reinforced trials                                | F (1, 20) = 8.091                |
| Extended Data Fig 1d | Lick rate across reward, neutral and aversive contexts with mice bearing GRIN implants (n=16 mice)                                           | Two-way ANOVA with Sidak's post hoc | p<0.0001; adjusted **p<0.01, ***p<0.001, ****p<0.0001                                 | F (2, 30) = 46.20                |
| Extended Data Fig 1e | Discrimination index across reinforced and probe trials (for data in 1d; n=16 mice)                                                          | Two-way ANOVA with Sidak's post hoc | p=0.01 for probe trials T1-T3                                                         |                                  |
| Extended Data Fig 3h | Comparison of fraction of neurons that are feature selective vs conjunctive in CA1 (n=3 mice)                                                | Two tailed paired t-test            | p=0.024                                                                               | t=6.336, df=2                    |

|                      |                                                                                                                                                                 |                                                         |                                            |                     |
|----------------------|-----------------------------------------------------------------------------------------------------------------------------------------------------------------|---------------------------------------------------------|--------------------------------------------|---------------------|
| Extended Data Fig 6a | Mean event rate of CA1 neurons across Control (n=4) , LEC-stGtACR2 (n=3) and AC-stGtACR2 (n=4) cohort (event/sec)                                               | Ordinary one-way ANOVA with Tukey's multiple comparison | p=0.2562                                   | F (2, 8) = 1.622    |
| Extended Data Fig 6b | Average time between consecutive onsets for CA1 neurons across Control (n=4) , LEC-stGtACR2 (n=3) and AC-stGtACR2 (n=4) cohort (in s)                           | Ordinary one-way ANOVA with Tukey's multiple comparison | p=0.9249                                   | F (2, 8) = 0.07880  |
| Extended Data Fig 6c | Mean onset activity of CA1 neurons (as fraction, Methods) across Control (n=4) , LEC-stGtACR2 (n=3) and AC-stGtACR2 (n=4) cohort                                | Ordinary one-way ANOVA with Tukey's multiple comparison | p=0.0008                                   | F (2, 8) = 20.13    |
| Extended Data Fig 6d | Fraction of context selective neurons across Control (n=4 mice, 9 sessions) , LEC-stGtACR2 (n=3 mice, 6 sessions) and AC-stGtACR2 (n=4 mice, 7 sessions) cohort | Ordinary one-way ANOVA with Tukey's multiple comparison | p=0.9456                                   | F (2, 19) = 0.05606 |
| Extended Data Fig 6e | Mean initial ensemble activity (mean onset times) of CA1 context ensembles in AC and LEC st-GtACR2 cohorts during light Off trials                              | Two-way ANOVA with Sidak's post hoc                     | p=0.2632                                   | F (1, 33) = 1.296   |
| Extended Data Fig 6f | Mean ensemble activity of CA1 non-context ensembles in AC and LEC st-GtACR cohorts during light Off trials                                                      | Two-way ANOVA with Sidak's post hoc                     | p=0.6905                                   | F (1, 33) = 0.1613  |
| Extended Data Fig 6g | Mean CA1 context ensemble activity in LEC GtACR2 cohort between Light off and Light on trials (n=3 mice, 6 sessions)                                            | Two-way ANOVA with Sidak's post hoc                     | p<0.0001; adjusted ***p<0.005; ****p<0.001 | F (15, 15) = 10.78  |
| Extended Data Fig 6g | Mean CA1 context ensemble activity in AC stGtACR2 cohort between Light off and Light on trials (n=4 mice, 7 sessions)                                           | Two-way ANOVA with Sidak's post hoc                     | p<0.0001; adjusted ***p<0.005; ****p<0.001 | F (1, 18) = 84.53   |
| Extended Data Fig 6h | Mean CA1 non-context ensemble activity in LEC GtACR cohort between Light off and Light on trials (n=3 mice, 6 sessions)                                         | Two-way ANOVA with Sidak's post hoc                     | p<0.0001; adjusted ***p<0.005;             | F (1, 15) = 82.37   |

|                      |                                                                                                                           |                                                    |                                                  |                   |
|----------------------|---------------------------------------------------------------------------------------------------------------------------|----------------------------------------------------|--------------------------------------------------|-------------------|
| Extended Data Fig 6h | Mean CA1 non-context ensemble activity in AC stGtACR2 cohort between Light off and Light on trials (n=4 mice, 7 sessions) | Two-way ANOVA with Sidak's post hoc                | P=0.0078; AVOT (p=0.61); AOT(p=0.31); OT(p=0.07) | F (1, 18) = 8.961 |
| Extended Data Fig 6i | Comparison of percent of CA1 context neurons inhibited (n=3 mice LEC stGtACR2, 4 mice AC stGtACR2)                        | Two tailed unpaired t-test                         | p= 0.0324                                        | t=2.937, df=5     |
| Extended Data Fig 6j | Comparison between percent inhibition of CA1 context vs non- context neurons by LEC inhibition (n=3 mice)                 | Two-way ANOVA with Sidak's post hoc                | P=0.2107                                         | F (1, 12) = 1.749 |
| Extended Data Fig 6j | Comparison between percent inhibition of CA1 context vs non- context neurons by AC inhibition (n=4 mice)                  | Two-way ANOVA with Sidak's post hoc                | P<0.0001; adjusted *p<0.05, **p<0.01             | F (1, 18) = 36.39 |
| Extended Data Fig 6k | percent dF/F change in CA1 context vs non-context neurons on LEC inhibition (n=3 mice, 6 sessions)                        | Two-way ANOVA with Sidak's post hoc                | P=0.0356                                         | F (1, 30) = 4.845 |
| Extended Data Fig 6k | percent dF/F change in CA1 context vs non-context neurons on AC inhibition (n=4 mice, 7 sessions)                         | Two-way ANOVA with Sidak's post hoc                | P<0.0001; adjusted *p<0.05, **p<0.01             | F (1, 36) = 33.52 |
| Extended Data Fig 7e | Comparison of % cells in CA1 that receive inputs from AC or LEC that overlay with cFos (n=4 mice, 8 slices total)         | Two tailed Welch's t-test                          | p=0.0024                                         | t=4.117, df=9.298 |
| Extended Data Fig 8l | Comparison of fraction of neurons that are feature selective vs conjunctive in AC (n=7 mice)                              | Two tailed Wilcoxon matched-pairs signed rank test | p=0.0156                                         | W=28              |
| Extended Data Fig 8n | Decoding accuracy of AC neurons during training across CA1 mcherry vs CA1 stGtACR2 cohort (n=3 mice)                      | Two tailed Mann Whitney U Test                     | p= 0.0081                                        | U= 868            |
| Extended Data Fig 8o | % of AC feature responsive neurons during retrieval across CA1 mcherry vs CA1 stGtACR2 cohort (n=3 mice)                  | Two tailed Mann Whitney U Test                     | p = 0.1000                                       | U=0               |

|                       |                                                                                                                                  |                                                |                                         |                                                    |
|-----------------------|----------------------------------------------------------------------------------------------------------------------------------|------------------------------------------------|-----------------------------------------|----------------------------------------------------|
| Extended Data Fig 9c  | Net dF/F response of feature responsive ensembles for same context vs opposite contexts for AC (n=7 mice) and CA1 (n=3 mice)     | Two-way ANOVA with Sidak's post hoc            | *p=0.02 (AC); ****p=0.0002 (CA1)        | t=2.849 DF= 16.00 (AC); t=5.035; DF= 16.00 (CA1)   |
| Extended Data Fig 9e  | Comparison of inter-context (context separation) vs intra-context (feature separation) in n-dimensional space between AC and CA1 | Two tailed Student's t-test                    | p=0.0031                                | t=3.385, df=19                                     |
| Extended Data Fig 10c | Lick rate of mice in modified behavior setup across neutral vs aversive feature trials (n=3 mice)                                | Two tailed paired t-test                       | p=0.023                                 | t=6.443, df=2                                      |
| Extended Data Fig 10f | Comparison of distribution of time onset of AC and CA1 context ensembles during training (m2)                                    | Two tailed Kolmogorov–Smirnov test             | p=0.015                                 |                                                    |
| Extended Data Fig 10f | Comparison of distribution of time onset of AC feature and CA1 context ensembles during retrieval (m2)                           | Two tailed Kolmogorov–Smirnov test             | p=0.002                                 |                                                    |
| Extended Data Fig 10f | Comparison of distribution of time onset of AC and CA1 context ensembles during training (m3)                                    | Two tailed Kolmogorov–Smirnov test             | p=0.001                                 |                                                    |
| Extended Data Fig 10f | Comparison of distribution of time onset of AC feature and CA1 context ensembles during retrieval (m3)                           | Two tailed Kolmogorov–Smirnov test             | p<0.0001                                |                                                    |
| Extended Data Fig 10f | Mean onset time from CDF of ensemble onsets across training and retrieval session between AC and CA1                             | Two-way ANOVA with Sidak's multiple comparison | p=0.01 (Training); p<0.0001 (Retrieval) | t=3.823; df=8 (Training); t=7.65; df=8 (Retrieval) |
